# Supplementary material for: Brachytherapy for targeting the immune system in cervical cancer patients
Source: BMC Immunol. 2023 Aug 9;24:23. doi: 10.1186/s12865-023-00559-y (PMC10413692; doi:10.1186/s12865-023-00559-y)
Supplement: Supplementary file 1 — Additional File 1: Changes in the different immune cell populations between baseline and after completion of CRT and two and four weeks after completion of HDR and PDR Brachytherapy [file 12865_2023_559_MOESM1_ESM.xlsx]

## Sheet: Hoja1
Changes in the different immune cell populations between baseline and after completion of CRT and two and four weeks after completion of HDR and PDR Brachytherapy.
Total lymphocytes
PDR
	1	2	3	4	5	6	7	8	9	10	11	12	MEDIAN
Baseline	0.139	0.26	0.283	0.102	0.445	0.31	0.199	0.279	0.168	0.504	0.235	0.147	0.2475
CRT	0.123	0.495	0.165	0.339	0.237	0.181	0.24	0.146	0.411	0.246	0.184	0.183	0.2105
2w BT	0.198	0.201	0.103	0.38	0.15	0.463	0.174	0.315	0.181	0.265	0.306	0.0966	0.1995
4w BT	0.101	0.129	0.235	0.257	0.195	0.221	0.161	0.42	0.154	0.277	0.222	0.0892	0.208
HDR
	1	2	3	4	5	6	7	8	9	10	11	12	MEDIAN
Baseline	0.346	0.305	0.254	0.098	0.245	0.382	0.0336						0.254
CRT	0.0239	0.136	0.211	0.112	0.157	0.0938	0.0819						0.112
2w BT	0.295	0.0991	0.212	0.251	0.207	0.469	0.273						0.251
4w BT	0.242	0.145	0.142	0.244	0.243	0.364	0.358						0.243
Lymphocytes B CD19+
PDR
	1	2	3	4	5	6	7	8	9	10	11	12	MEDIAN
Baseline	0.0417	0.0498	0.0616	0.116	0.0633	0.0864	0.0783	0.0514	0.0367	0.128	0.0828	0.111	0.0708
CRT	0.0173	0.0243	0.0072	0.0045	0.0077	0.0291	0.0297	0.0226	0.003	0.03	0.0114	0.0258	0.01995
2w BT	0.0149	0.0214	0.0126	0.0025	0.0154	0.0149	0.0277	0.0089	0.0026	0.0486	0.0093	0.0584	0.0149
4w BT	0.0186	0.0274	0.0369	0.0115	0.0317	0.019	0.0523	0.007	0.0049	0.0652	0.0254	0.054	0.0264
HDR
	1	2	3	4	5	6	7	8	9	10	11	12	MEDIAN
Baseline	0.0836	0.0927	0.114	0.154	0.00034	0.126	0.0578						0.0927
CRT	0.0249	0.0401	0.0171	0.0244	0.0031	0.0099	0.0276						0.0244
2w BT	0.0294	0.0432	0.0123	0.0232	0.0015	0.0095	0.0107						0.0123
4w BT	0.061	0.0555	0.0218	0.0364	0.0201	0.0247	0.0129						0.0247
Lymphocytes T CD3+
PDR
	1	2	3	4	5	6	7	8	9	10	11	12	MEDIAN
Baseline	0.753	0.898	0.548	0.657	0.824	0.712	0.721	0.742	0.822	0.533	0.764	0.696	0.7315
CRT	0.678	0.923	0.354	0.827	0.653	0.664	0.547	0.616	0.707	0.438	0.545	0.493	0.6345
2w BT	0.709	0.847	0.667	0.837	0.556	0.67	0.64	0.823	0.739	0.422	0.655	0.419	0.6685
4w BT	0.543	0.839	0.667	0.919	0.703	0.72	0.653	0.826	0.679	0.408	0.635	0.442	0.673
HDR
	1	2	3	4	5	6	7	8	9	10	11	12	MEDIAN
Baseline	0.821	0.744	0.644	0.445	0.768	0.627	0.679						0.679
CRT	0.766	0.648	0.534	0.456	0.679	0.578	0.551						0.578
2w BT	0.695	0.654	0.586	0.629	0.777	0.77	0.631						0.654
4w BT	0.652	0.615	0.53	0.605	0.726	0.756	0.611						0.615
Lymphocytes T CD3+CD8+
PDR
	1	2	3	4	5	6	7	8	9	10	11	12	MEDIAN
Baseline	0.759	0.712	0.629	0.486	0.599	0.554	0.701	0.28	0.695	0.655	0.57	0.613	0.621
CRT	0.775	0.778	0.677	0.15	0.245	0.663	0.7	0.268	0.382	0.684	0.366	0.67	0.6665
2w BT	0.766	0.681	0.258	0.123	0.386	0.385	0.592	0.113	0.193	0.623	0.309	0.723	0.3855
4w BT	0.743	0.582	0.236	0.104	0.261	0.438	0.64	0.0931	0.238	0.584	0.381	0.677	0.4095
HDR
	1	2	3	4	5	6	7	8	9	10	11	12	MEDIAN
Baseline	0.783	0.753	0.758	0.51	0.517	0.485	0.613						0.613
CRT	0.743	0.784	0.685	0.664	0.396	0.366	0.701						0.685
2w BT	0.69	0.643	0.443	0.459	0.267	0.179	0.478						0.459
4w BT	0.682	0.643	0.395	0.471	0.338	0.18	0.504						0.471
Lymphocytes T CD3+CD4+
PDR
	1	2	3	4	5	6	7	8	9	10	11	12	MEDIAN
Baseline	0.185	0.239	0.246	0.459	0.33	0.394	0.262	0.648	0.221	0.293	0.367	0.333	0.3115
CRT	0.16	0.183	0.181	0.816	0.704	0.29	0.265	0.694	0.517	0.254	0.493	0.261	0.2775
2w BT	0.177	0.271	0.462	0.865	0.54	0.57	0.381	0.867	0.701	0.291	0.599	0.241	0.501
4w BT	0.198	0.359	0.58	0.877	0.687	0.528	0.25	0.89	0.665	0.337	0.538	0.273	0.533
HDR
	1	2	3	4	5	6	7	8	9	10	11	12	MEDIAN
Baseline	0.173	0.2	0.215	0.442	0.354	0.404	0.312						0.312
CRT	0.194	0.174	0.286	0.302	0.403	0.386	0.227						0.286
2w BT	0.26	0.268	0.515	0.507	0.542	0.554	0.352						0.507
4w BT	0.264	0.308	0.561	0.494	0.486	0.611	0.369						0.486
Lymphocytes T Cells Ratio CD4/CD8
PDR
	1	2	3	4	5	6	7	8	9	10	11	12	MEDIAN
Baseline	0.24369	0.33645	0.390661	0.94573	0.551345	0.711537	0.373476	2.31793	0.31762	0.447342	0.643205	0.542809	0.447342
CRT	0.206085	0.235213	0.267963	5.44838	2.87093	0.4374	0.378302	2.5936	1.35335	0.371943	1.34664	0.390271	0.4374
2w BT	0.231629	0.398666	1.79441	7.01021	1.39761	1.48037	0.64272	7.69649	3.63938	0.466801	1.93973	0.332519	1.48037
4w BT	0.26671	0.616895	2.45326	8.3965	2.6296	1.20351	0.389888	9.55872	2.79301	0.577137	1.41192	0.402528	1.41192
HDR
	1	2	3	4	5	6	7	8	9	10	11	12	MEDIAN
Baseline	0.220981	0.2659	0.283652	0.867143	0.68386	0.833373	0.508131						0.52547
CRT	0.261754	0.22191	0.416655	0.454023	1.01767	1.05293	0.323068						0.403463
2w BT	0.377148	0.416959	1.16328	1.1039	2.03184	3.10427	0.736629						0.920265
4w BT	0.38693	0.4785	1.42238	1.04915	1.44	3.39669	0.73117						0.890159
NK CD56dim CD16+
PDR
	1	2	3	4	5	6	7	8	9	10	11	12	MEDIAN
Baseline	0.204	0.179	0.281	0.29	0.295	0.359	0.252	0.423	0.295	0.317	0.338	0.345	0.295
CRT	0.186	0.141	0.0343	0.302	0.118	0.128	0.208	0.262	0.231	0.234	0.0629	0.102	0.1635
2w BT	0.191	0.0965	0.0797	0.124	0.138	0.241	0.265	0.235	0.249	0.247	0.142	0.196	0.1935
4w BT	0.179	0.174	0.131	0.252	0.179	0.228	0.304	0.262	0.239	0.188	0.185	0.186	0.187
HDR
	1	2	3	4	5	6	7	8	9	10	11	12	MEDIAN
Baseline	0.321	0.143	0.334	0.627	0.331	0.561	0.541						0.334
CRT	0.13	0.106	0.131	0.211	0.216	0.41	0.149						0.149
2w BT	0.129	0.268	0.354	0.476	0.389	0.511	0.458						0.389
4w BT	0.168	0.181	0.347	0.449	0.411	0.559	0.42						0.411
NK CD56high CD16+
PDR
	1	2	3	4	5	6	7	8	9	10	11	12	MEDIAN
Baseline	0.0025	0.0075	0.00021	0.00095	0.0163	0.0053	0.0014	0.002	0.0017	0.00055	0.0008	0.0071	0.00185
CRT	0.0031	0.0114	0.00026	0.0025	0.0131	0.003	0.004	0.0022	0.0068	0.00097	0.00061	0.0043	0.00305
2w BT	0.0069	0.0158	0.0034	0.00065	0.0196	0.0029	0.0034	0.003	0.0045	0.00096	0.002	0.0139	0.0034
4w BT	0.0043	0.0087	0.0017	0	0.0159	0.0039	0.0018	0.0028	0.0029	0.00055	0.0017	0.0166	0.00285
HDR
	1	2	3	4	5	6	7	8	9	10	11	12	MEDIAN
Baseline	0.0038	0.0041	0.0059	0.00035	0.0062	0.0035	0.001						0.0038
CRT	0.0141	0.0041	0.008	0.0016	0.0073	0.0053	0.00079						0.0053
2w BT	0.0091	0.0033	0.0116	0.0053	0.0126	0.0041	0.0084						0.0084
4w BT	0.0109	0.0091	0.014	0.0042	0.0125	0.0072	0.0038						0.0091
NK cells (CD56dim CD16-)
PDR
	1	2	3	4	5	6	7	8	9	10	11	12	MEDIAN
Baseline	0.0195	0.0063	0.0572	0.021	0.0184	0.0132	0.0127	0.0118	0.043	0.012	0.0444	0.0101	0.0158
CRT	0.0696	0.0371	0.278	0.0724	0.0291	0.0129	0.0123	0.0425	0.26	0.0139	0.151	0.048	0.04525
2w BT	0.0506	0.0156	0.18	0.205	0.0369	0.0135	0.014	0.0564	0.0587	0.0097	0.0856	0.055	0.0528
4w BT	0.0438	0.0064	0.108	0.0122	0.0329	0.0143	0.0136	0.0356	0.0686	0.0157	0.067	0.0108	0.0243
HDR
	1	2	3	4	5	6	7	8	9	10	11	12	MEDIAN
Baseline	0.0092	0.0484	0.0091	0.0473	0.0568	0.0055	0.0782						0.0473
CRT	0.027	0.0607	0.026	0.0608	0.116	0.0439	0.0929						0.0607
2w BT	0.0237	0.0241	0.0121	0.0488	0.0126	0.025	0.0487						0.0241
4w BT	0.0233	0.0636	0.0106	0.0411	0.0268	0.0186	0.0686						0.0268
NK cells (CD56- CD16+)
PDR
	1	2	3	4	5	6	7	8	9	10	11	12	MEDIAN
Baseline	0.389	0.146	0.188	0.248	0.206	0.18	0.11	0.241	0.302	0.207	0.146	0.208	0.2065
CRT	0.426	0.0486	0.179	0.406	0.561	0.521	0.401	0.374	0.234	0.515	0.213	0.512	0.4035
2w BT	0.448	0.474	0.237	0.177	0.45	0.525	0.3	0.336	0.569	0.546	0.291	0.391	0.4195
4w BT	0.428	0.463	0.278	0.541	0.448	0.459	0.297	0.293	0.45	0.27	0.291	0.498	0.438
HDR
	1	2	3	4	5	6	7	8	9	10	11	12	MEDIAN
Baseline	0.116	0.166	0.134	0.0384	0.205	0.0599	0.145						0.134
CRT	0.389	0.437	0.464	0.272	0.464	0.261	0.441						0.437
2w BT	0.352	0.492	0.401	0.252	0.518	0.293	0.349						0.352
4w BT	0.341	0.372	0.355	0.246	0.29	0.176	0.257						0.29
Treg CD4+CD25+Foxp3+CD45RA-
PDR
	1	2	3	4	5	6	7	8	9	10	11	12	MEDIAN
Baseline	0.0042	0.0363	0.0121	0.0038	0.0107	0.0185	0.007	0.0211	0.0305	0.0283	0.057	0.0114	0.0153
CRT	0.0118	0.0336	0.0168	0.0255	0.034	0.0115	0.0541	0.0372	0.0141	0.0561	0.0709	0.0294	0.0315
2w BT	0.0371	0.0577	0.0329	0.0083	0.0638	0.017	0.0262	0.0358	0.0493	0.0492	0.0498	0.134	0.04315
4w BT	0.0198	0.0413	0.0118	0.0054	0.0344	0.0025	0.0244	0.0227	0.0559	0.157	0.0555	0.072	0.0294
HDR
	1	2	3	4	5	6	7	8	9	10	11	12	MEDIAN
Baseline	0.0316	0.0087	0.0218	0.0142	0.0474	0.0286	0.0254						0.0254
CRT	0.049	0.0204	0.0193	0.0396	0.0671	0.0193	0.0131						0.0204
2w BT	0.0051	0.015	0.0444	0.035	0.072	0.0399	0.0188						0.035
4w BT	0.0606	0.03	0.0452	0.0415	0.0853	0.031	0.0202						0.0415
Treg (CD4+CD25+ FoxP3+ CD45RA+)
PDR
	1	2	3	4	5	6	7	8	9	10	11	12	MEDIAN
Baseline	0.00054	0.0025	0.0012	0	0.0075	0.0066	0.0029	0.00081	0.0013	0.0055	0.019	0.0008	0.0019
CRT	0.0039	0	0	0.0323	0.0094	0.0095	0	0.0114	0.0707	0.0577	0.104	0	0.00945
2w BT	0.0085	0.0067	0.103	0	0.0222	0.0032	0.0041	0.0023	0.0385	0.0211	0.0463	0.0476	0.0148
4w BT	0.0013	0.0029	0	0.0556	0.0346	0	0.0057	0.0032	0.0476	0.12	0.0094	0.0047	0.0052
HDR
	1	2	3	4	5	6	7	8	9	10	11	12	MEDIAN
Baseline	0.0012	0.0024	0.0043	0.00061	0.0219	0.0033	0.007						0.0033
CRT	0.0142	0.0397	0.0166	0.016	0.208	0.288	0.0329						0.0329
2w BT	0.0036	0.0072	0.0181	0.0088	0.0145	0.0444	0.0153						0.0145
4w BT	0.0402	0.0134	0.0071	0.007	0.04	0.0096	0.006						0.0096
MDSC (CD33+CD11b+)
PDR
	1	2	3	4	5	6	7	8	9	10	11	12	MEDIAN
Baseline	0.0774	0.0692	0.126	0.0906	0.0895	0.0745	0.0407	0.0884	0.0604	0.127	0.0577	0.0598	0.07595
CRT	0.108	0.0823	0.186	0.128	0.163	0.125	0.125	0.128	0.147	0.217	0.116	0.271	0.128
2w BT	0.124	0.139	0.153	0.204	0.107	0.197	0.0874	0.0938	0.11	0.204	0.173	0.114	0.1315
4w BT	0.135	0.104	0.13	0.118	0.101	0.119	0.0678	0.0922	0.0894	0.15	0.121	0.0978	0.111
HDR
	1	2	3	4	5	6	7	8	9	10	11	12	MEDIAN
Baseline	0.0617	0.075	0.0587	0.0096	0.0808	0.0704	0.051						0.0617
CRT	0.106	0.0779	0.107	0.113	0.0979	0.0852	0.102						0.102
2w BT	0.143	0.0785	0.0962	0.161	0.0902	0.158	0.218						0.143
4w BT	0.131	0.0693	0.069	0.159	0.099	0.104	0.159						0.104
Granulocytes G-CD33+CD11b+CD14-
PDR
	1	2	3	4	5	6	7	8	9	10	11	12	MEDIAN
Baseline	0.776	0.676	0.645	0.815	0.498	0.679	0.785	0.693	0.786	0.513	0.751	0.801	0.722
CRT	0.767	0.417	0.725	0.637	0.653	0.709	0.712	0.718	0.506	0.582	0.757	0.621	0.681
2w BT	0.729	0.686	0.687	0.505	0.766	0.461	0.785	0.629	0.744	0.641	0.614	0.811	0.6865
4w BT	0.744	0.777	0.66	0.662	0.713	0.699	0.798	0.557	0.788	0.66	0.712	0.836	0.7125
HDR
	1	2	3	4	5	6	7	8	9	10	11	12	MEDIAN
Baseline	0.667	0.655	0.74	0.902	0.694	0.651	0.77						0.694
CRT	0.773	0.823	0.742	0.79	0.777	0.841	0.832						0.79
2w BT	0.619	0.849	0.738	0.63	0.732	0.455	0.491						0.63
4w BT	0.672	0.824	0.824	0.637	0.675	0.528	0.542						0.672
Monocytes Mo-CD33+CD11b+CD14+HLADR−/low
PDR
	1	2	3	4	5	6	7	8	9	10	11	12	MEDIAN
Baseline	0.0722	0.072	0.0665	0.0392	0.0494	0.052	0.076	0.0601	0.0591	0.0487	0.0515	0.144	0.0596
CRT	0.0505	0.0385	0.048	0.0742	0.0403	0.0432	0.0864	0.0451	0.0514	0.0514	0.0243	0.128	0.04925
2w BT	0.0661	0.0674	0.0648	0.0584	0.0401	0.0346	0.0864	0.0472	0.0723	0.0482	0.0404	0.158	0.0616
4w BT	0.0707	0.0958	0.0647	0.087	0.0472	0.0394	0.0576	0.0601	0.0719	0.0203	0.0548	0.118	0.0624
HDR
	1	2	3	4	5	6	7	8	9	10	11	12	MEDIAN
Baseline	0.0594	0.105	0.0718	0.0787	0.0837	0.0505	0.0826						0.0787
CRT	0.0429	0.114	0.0636	0.0554	0.0745	0.0381	0.0427						0.0554
2w BT	0.0419	0.123	0.0679	0.065	0.0903	0.0423	0.049						0.065
4w BT	0.0422	0.0975	0.0791	0.0708	0.0942	0.0456	0.0528						0.0708
4w BT	0.131	0.0693	0.069	0.159	0.099	0.104	0.159						0.104
Percentages and median values of cell populations during the study period at different time points for HDR and PDR brachytherapy groups: Total Lymphocytes; Lymphocytes B CD19+; Lymphocytes T CD3+; Lymphocytes T CD3+CD8+; Lymphocytes T CD3+CD4+; Ratio CD4/CD8; NK CD56dimCD16+; NK CD56highCD16+; NK CD56dimCD16-; NK CD56-CD16+; Treg CD4+CD25+FoxP3+CD45RA-; Treg CD4+CD25+FoxP3+CD45RA+, MDSC CD33+CD11…
